# Reconstitution of the Functional Receptors for Murine and Human Interleukin 5

By Satoshi Takaki, Yoshiyuki Murata,\* Toshio Kitamura,†  
Atsushi Miyajima,‡ Akira Tominaga,\* and Kiyoshi Takatsu

From the Department of Immunology, Institute of Medical Science, the University of Tokyo, Minato-ku, Tokyo 108, Japan; the \*Department of Cell Differentiation, Institute of Molecular Embryology and Genetics, Kumamoto University Medical School, Kumamoto 860, Japan; and the †Department of Molecular Biology, DNAX Research Institute of Molecular and Cellular Biology, Palo Alto, California 94304

## Summary

The murine interleukin 5 receptor (mIL-5R) is composed of two distinct subunits,  $\alpha$  and  $\beta$ . The  $\alpha$  subunit (mIL-5R $\alpha$ ) specifically binds IL-5 with low affinity. The  $\beta$  subunit (mIL-5R $\beta$ ) does not bind IL-5 by itself, but forms the high-affinity receptor with mIL-5R $\alpha$ . mIL-5R $\beta$  has been revealed to be the mIL-3R-like protein, AIC2B which is shared with receptors for IL-3 and granulocyte/macrophage colony-stimulating factor. We demonstrated here the reconstitution of the functional receptors for murine and human IL-5 on the mouse IL-2-dependent cell line, CTLL-2. CTLL-2 was transfected with the cDNAs for mIL-5R $\alpha$  and/or AIC2B. Only CTLL-2 transfectant expressing both mIL-5R $\alpha$  and AIC2B expressed the high-affinity receptor and proliferated in response to murine IL-5. Then CTLL-2 was transfected with the cDNAs for hIL-5R $\alpha$  and/or KH97 ( $\beta_c$ ), the human homologue of AIC2B. Though  $\beta_c$  did not contribute much to binding affinity of hIL-5R, only CTLL-2 transfectant expressing both hIL-5R $\alpha$  and  $\beta_c$  proliferated in response to human IL-5. These results showed that the  $\beta$  subunit is indispensable in IL-5 signal transduction. We further investigated the function of IL-5-specific  $\alpha$  subunit in transmitting IL-5 signals. Mutant mIL-5R $\alpha$ , which lacks its whole cytoplasmic domain, was transfected into mouse IL-3-dependent cell line, FDC-P1 expressing AIC2B intrinsically. The resulting transfectant did not respond to IL-5, though the transfectant expressed the high-affinity IL-5R, indicating that the cytoplasmic portion of the  $\alpha$  subunit also has some important role in IL-5-mediated signal transduction.

IL-5 is a glycoprotein produced by activated T cells and mast cells. IL-5 was originally identified as a cytokine that stimulates proliferation and differentiation of murine (m)<sup>1</sup> activated B cells, and proved to regulate the production and function of some other hematopoietic cells, such as CD5<sup>+</sup> B cells, eosinophils, and basophils (1). In humans, IL-5 acts mainly on eosinophils. IL-5 induces the production of eosinophils from bone marrow progenitors and works for survival and priming of eosinophils in vitro. IL-5 expression was observed in many diseases with eosinophilia, suggesting that IL-5 plays important roles in promoting production and function of eosinophils in vivo (2).

From the series of binding and crosslinking studies, we have shown that mIL-5 binds to a specific cell surface receptor (mIL-5R) with both high ( $K_d = 10\text{--}150$  pM) and low affinity ( $K_d = 2\text{--}10$  nM) and that two distinct membrane

proteins,  $\alpha$  and  $\beta$ , comprise the functional mIL-5R (3). The cloning of mIL-5R $\alpha$  cDNA discloses molecular constitutions of mIL-5R (4). The mIL-5R $\alpha$  alone binds IL-5 with low affinity. The mIL-5R $\beta$  does not bind IL-5 by itself, however, it forms the high-affinity IL-5R in combination with the mIL-5R $\alpha$  (4, 5). The mIL-5R $\beta$  was then identified as AIC2B (6), the homologous protein of the low-affinity mIL-3R (AIC2A[7])(8, 9). The high-affinity mIL-5R is reconstituted on L cell transfectant coexpressing mIL-5R $\alpha$  and AIC2B. Because the L cell transfectant does not respond to mIL-5 in DNA synthesis, it remains, however, unclear whether the reconstituted high-affinity mIL-5R transduces the IL-5-mediated signal into cell interior.

In contrast to mIL-5R, there are controversial reports about human (h)IL-5R. In many cases, only a single class of hIL-5R with high affinity is detected on hIL-5-responsive cells, but its binding affinity to hIL-5 has been reported as various values (10–13). There is one report describing two kinds of hIL-5Rs on human erythroleukemic cell line, TF-1 (14). Some

<sup>1</sup> Abbreviations used in this paper: h, human; m, murine; R, receptor.

reports show that hIL-5R is specific for hIL-5 (10–13), however, others show that binding of hIL-5 is competed by hIL-3 or hGM-CSF at 4°C (cross-competition) (15). We isolated hIL-5R $\alpha$  by cross-species hybridization (16). The hIL-5R $\alpha$  resembles mIL-5R $\alpha$  in its primary structure. It is, therefore, very likely that functional hIL-5R requires the  $\beta$  subunits, and that is the human homologue of AIC2 proteins, KH97, the common  $\beta$  subunit ( $\beta_c$ ) of hGM-CSF (receptor) R and hIL-3R (17, 18). Recent cloning of cDNAs for mIL-3R $\alpha$  and mGM-CSFR $\alpha$  show that AIC2B is the common  $\beta$  subunit of the receptors for mIL-3 and mGM-CSF (and that AIC2A is mIL-3R $\beta$ ) (19, 20). However, COS7 cells transfected with hIL-5R $\alpha$  cDNA binds hIL-5 with almost the same affinity compared to normal eosinophils (16). It remains an unsolved issue how putative hIL-5R $\beta$  contributes to the binding of hIL-5 and transmitting signals.

In this report, we demonstrate the reconstitution of the functional receptors for m and hIL-5 on a mouse IL-2-dependent cell line, CTLL-2. In both mouse and humans, the functional IL-5R complex contains two different membrane proteins,  $\alpha$  and  $\beta$ . hIL-5R $\beta$  is revealed to be the common molecule that is shared with hIL-3R and hGM-CSFR, and does not contribute much to increasing the binding affinity of hIL-5 in contrast to the mIL-5R system. In addition, using mutant mIL-5 $\alpha$  which lacks the whole cytoplasmic domain, we showed that the  $\alpha$  subunit has an important role not only in determining the binding specificity, but also in transmitting the growth signal of IL-5.

## Materials and Methods

**Cells and Reagents.** A mouse IL-2-dependent CTLL-2 cell line was maintained in RPMI 1640 medium supplemented with 10% FCS and 50  $\mu$ M 2-ME and 5% conditioned medium from Con A-stimulated rat spleen cells. A mouse IL-3-dependent FDC-P1 cell line was maintained in RPMI 1640 medium supplemented with 5% FCS, 50  $\mu$ M 2-ME, and 5 U/ml of mIL-3. mIL-5 was prepared and purified using anti-mIL-5 mAb-coupled beads (3). Purified hIL-5 was obtained from DNAX Research Institute.

**Plasmid Construction.** The cDNA fragments were inserted downstream of the SR $\alpha$  promoter in the expression vector, pME18, the derivative of pCEV4 (7) (Maruyama, K., and A. Miyajima, unpublished results). Either neomycin or hygromycin-resistant selection maker was added to the vectors. To construct the plasmid that expresses the truncated mutant mIL-5R $\alpha$ , an XhoI-PstI fragment of mIL-5R $\alpha$  cDNA corresponding mostly to the extracellular and transmembrane portion was excised, and then ligated into the XhoI and NotI armed pME18 vector, to which the hygromycin-resistant gene had been added, by the use of asymmetric adopters (5'GAG-TGTGTTAGC and 5'GGCCGCTAACACACTCTGCA) that generate a new stop codon. Resulting plasmid-encoded mutant mIL-5R $\alpha$  terminated to the end of transmembrane domain (Cys, position 361 in mIL-5R $\alpha$  [4]).

**Transfection.** Cells were washed twice and resuspended in Hepes buffered saline (pH 7.2).  $10^7$  cells per 800  $\mu$ l were then transfected with 50  $\mu$ g of linearized plasmid DNA by electroporation by 350 V and 960  $\mu$ F in a 0.4-cm gap cuvette using Gene Pulser (Bio-Rad Laboratories, Richmond, CA). Transfectants were selected in the medium containing either 400  $\mu$ g/ml of G418 (geneticin; Sigma Chemical Co., St. Louis, MO) or 200–400  $\mu$ g/ml of hygromycin

(Wako Pure Chemical Industries, Osaka, Japan), depending on the selection marker on the plasmid DNA. The expression of the cDNA products was examined by flow cytometry analysis using mAbs against mIL-5R $\alpha$  (H7) (21), AIC2A or AIC2B (anti-Aic-2) (22), and KH97 (CRS-1) (23), except for the hIL-5R $\alpha$  transfectants. The expression of hIL-5R $\alpha$  was verified by binding assay using  $^{125}$ I-hIL-5.

**IL-5 Binding Assay.** Purified hIL-5 was iodo labeled using IODO-GEN<sup>®</sup> (Pierce Chemical Co., Rockford, IL). mIL-5 were biosynthetically  $^{35}$ S-methionine labeled, as previously described (3). Specific activities of  $^{125}$ I-labeled hIL-5 and  $^{35}$ S-labeled mIL-5 were  $5.5 \times 10^6$  cpm/pmol and  $4.7 \times 10^6$  cpm/pmol, respectively. For binding assay,  $5\text{--}10 \times 10^5$  cells were incubated in the binding medium (RPMI 1640 medium containing 25 mM Hepes, pH 7.2 and 0.1% BSA) with increased concentrations of radiolabeled IL-5 at 4°C for 2 h. Cell-associated radioactivity was separated from free ligand by centrifugation through 3:2 dibutyl/dioctyl phthalates and counted. Specific binding was defined as the difference between total and nonspecific binding obtained in the presence of 100-fold molar excess of unlabeled IL-5. Binding data were analyzed by Scatchard analysis using the EBDA and LIGAND computer programs (Elsevier-BIOSOFT, Cambridge, UK).

**Chemical Crosslinking.** Crosslinking experiments using mIL-5R transfectants were performed according to the method described previously (3). In brief,  $5 \times 10^6$  cells were incubated with radiolabeled IL-5, collected, and resuspended in 500  $\mu$ l of HBSS containing 1 mM disuccinimidyl tartarate (DST; Pierce Chemical Co.). After incubation at 4°C for 30 min, cells were solubilized with lysis buffer (PBS containing 1% Triton X-100 and protease inhibitors). After removing insoluble fraction by centrifugation, cell lysates were subjected to SDS-PAGE (7.5% polyacrylamide) under reducing condition. Gel was fixed and dried, then analyzed by Fijix BAS2000 Bioimaging Analyzer (Fuji Photo Film, Tokyo, Japan). For hIL-5R transfectants, crosslinking was performed in PBS containing 200  $\mu$ M disuccinimidyl suberate (DSS; Pierce Chemical Co.), instead of 1 mM DST (14).

**Proliferation Assay.** Transfectants were harvested and washed with HBSS, then inoculated into a 96-well microtiter plate at a concentration of  $10^4$ /200  $\mu$ l per well with various concentrations of m or hIL-5. The cells were pulse labeled with [ $^3$ H]thymidine (0.2  $\mu$ Ci/well) during the last 6 h of a 48-h culture period, and incorporated [ $^3$ H]thymidine was measured by a liquid scintillation counter.

## Results

**Reconstitution of the Functional mIL-5R in IL-2-dependent CTLL-2 Cells.** In a previous report, we reconstituted the high-affinity mIL-5R on fibroblastic L cells by coexpressing mIL-5R $\alpha$  and AIC2B, however, the transfectant does not respond to mIL-5 in DNA synthesis (8). To test the signal-transducing ability of recombinant mIL-5Rs, we introduced cDNAs of the mIL-5R $\alpha$  and/or AIC2B into mIL-2-dependent CTLL-2 cell line. The stable CTLL-2 transfectants expressing mIL-5R $\alpha$  alone (CTLL-m5R $\alpha$ ) or coexpressing mIL-5R $\alpha$  and AIC2A (CTLL-m5R $\alpha$ -2A) bound mIL-5 with low affinity ( $K_d = 2\text{--}5$  nM). Only the transfectant coexpressing mIL-5R $\alpha$  and AIC2B (CTLL-m5R $\alpha$ -2B) bound mIL-5 not only with low but also with high affinity ( $K_d = 10\text{--}60$  pM) (data not shown). These results were consistent with our previous observation obtained using L cell transfectants (8). Responsiveness of these CTLL-2 transfectants to mIL-5

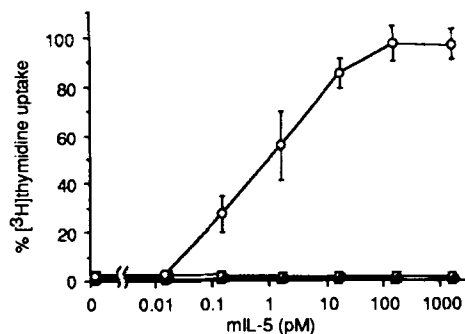

**Figure 1.** IL-5-responsiveness of the CTLL-2 transfectants expressing mIL-5R $\alpha$ , AIC2B, and AIC2A. Cells were incubated for 48 h in the presence of various concentrations of mIL-5 and incorporated [ $^3$ H]thymidine was measured. The results are expressed as the percentage of incorporation of [ $^3$ H]thymidine in the same cells incubated with 100 U/ml of hIL-2. Data are shown in mean  $\pm$  SD of three independent transfectant clones. (●) CTLL-m5R $\alpha$  (expressing mIL-5R $\alpha$ ), (□) CTLL-2B (expressing AIC2B), (■) CTLL-m5R $\alpha$ -2A (expressing mIL-5R $\alpha$  and AIC2A), and (○) CTLL-m5R $\alpha$ -2B (expressing mIL-5R $\alpha$  and AIC2B).

was then examined. As shown in Fig. 1, only CTLL-m5R $\alpha$ -2B which expressed the high-affinity mIL-5R responded to mIL-5 in DNA synthesis. mIL-5 induced a similar magnitude of proliferative response to that induced by IL-2. CTLL-m5R $\alpha$ -2B could be maintained by mIL-5 in the absence of IL-2 for long periods of time (data not shown).

**Binding Characteristics of the hIL-5R Transfectants.** Next, we established the stable CTLL-2 transfectants expressing either hIL-5R $\alpha$  and/or KH97 ( $\beta_c$ ). First, the hIL-5 binding characteristics of resulting transfectants were examined. CTLL-2 expressing hIL-5R $\alpha$  alone (CTLL-h5R $\alpha$ ) bound hIL-5 with almost similar affinity ( $K_d$  = 650–720 pM) to that of normal eosinophils (Fig. 2, ○) as we previously showed using COS7 cells (16). Transfectants expressing  $\beta_c$  (CTLL- $\beta_c$ ) did not bind hIL-5 (see Fig. 3, lanes 3 and 4).

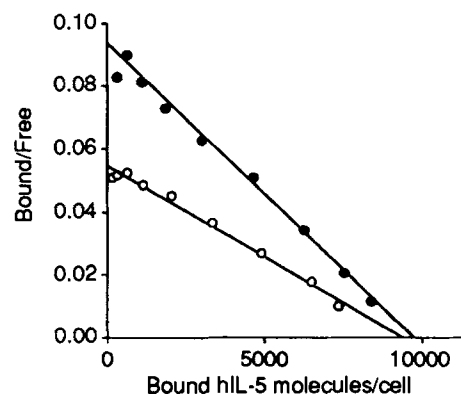

**Figure 2.** Scatchard plot analysis of  $^{125}$ I-hIL-5 binding to CTLL-2 transfectants. (○) CTLL-h5R $\alpha$  (expressing hIL-5R $\alpha$ ) and (●) CTLL-h5R $\alpha$ - $\beta_c$  (expressing hIL-5R $\alpha$  and  $\beta_c$ ). Two independent clones of CTLL-h5R $\alpha$  and three clones of CTLL-h5R $\alpha$ - $\beta_c$  were analyzed. The  $K_d$  values are 650 and 720 pM for CTLL-h5R $\alpha$ , and 310–450 pM for CTLL-h5R $\alpha$ - $\beta_c$  transfectants. The representative results were presented.

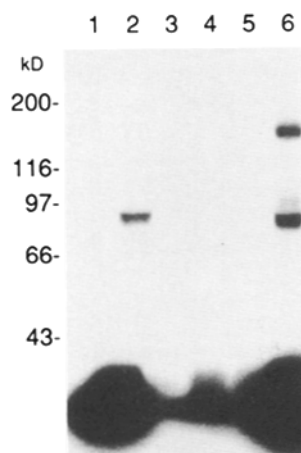

**Figure 3.** Chemical crosslinking of  $^{125}$ I-hIL-5 to CTLL-2 transfectants. (Lanes 1 and 2) CTLL-h5R $\alpha$  (expressing hIL-5R $\alpha$ ); (lanes 3 and 4) CTLL- $\beta_c$  (expressing  $\beta_c$ ); and (lanes 5 and 6) CTLL-h5R $\alpha$ - $\beta_c$  (expressing hIL-5R $\alpha$  and  $\beta_c$ ). Cells were incubated with 4 nM  $^{125}$ I-hIL-5 at 4°C for 2 h in the presence (lanes 1, 3, and 5) or absence (lanes 2, 4, and 6) large molar excess of unlabeled IL-5, and were crosslinked with DSS. The cell lysates were subjected to SDS-PAGE under reducing conditions, and were analyzed by a BAS2000 Bioimaging Analyzer (Fuji Photo Film).

The value of binding affinity of a transfectant coexpressing hIL-5R $\alpha$  and  $\beta_c$  (CTLL-h5R $\alpha$ - $\beta_c$ ) did not differ so much, but was slightly higher ( $K_d$  = 310–450 pM) (Fig. 2, ●) than that of CTLL-h5R $\alpha$ . However, the interaction of  $\beta_c$  with hIL-5R $\alpha$  was confirmed by chemical crosslinking experiments. When CTLL-h5R $\alpha$  was incubated with  $^{125}$ I-IL-5 and crosslinked with DSS, an  $\sim$ 80-kD band corresponding to the complex of hIL-5R $\alpha$  and hIL-5 was detected (Fig. 3, lane 2). In contrast, when CTLL-h5R $\alpha$ - $\beta_c$  was cross-linked with  $^{125}$ I-IL-5, a  $\sim$ 140-kD band corresponding to the complex of  $\beta_c$  and hIL-5 was detected in addition to 80-kD band (Fig. 3, lane 6). Though  $\beta_c$  did not greatly change the binding affinity of hIL-5R $\alpha$  and hIL-5, it indeed existed in close proximity to hIL-5 when hIL-5R $\alpha$  was expressed. It is highly suggestive that  $\beta_c$  interacts with hIL-5R $\alpha$  in binding to hIL-5.

**Reconstitution of the Functional hIL-5R.** To clarify whether  $\beta_c$  is necessary for the signal transduction through IL-5R, the responsiveness of the transfectants was examined. As shown in Fig. 4, neither CTLL-h5R $\alpha$  nor CTLL- $\beta_c$  respond to hIL-5. Only CTLL-h5R $\alpha$ - $\beta_c$  responded to hIL-5 in DNA synthesis. Moreover, CTLL-h5R $\alpha$ - $\beta_c$  acquired the ability to proliferate in response to hIL-5 without IL-2 for more than 2 mo (data not shown). From these results, it was confirmed that  $\beta_c$  is indispensable for the functional hIL-5R. In murine IL-2-dependent cells, reconstituted hIL-5R could associate to murine cytoplasmic proteins that transduce growth signals.

**Consequences of the Deletion of the Cytoplasmic Domain of  $\alpha$  Subunit.** From these transfection experiments, it was confirmed that the common  $\beta$  subunit shared among receptors for IL-5, IL-3, and GM-CSF, AIC2B in mice and  $\beta_c$  (KH97) in humans, is indispensable to construct functional IL-5Rs.

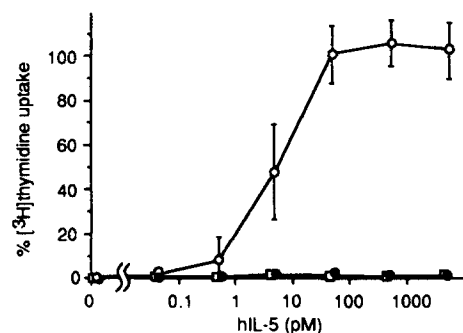

**Figure 4.** IL-5-dependent proliferation of CTLL-2 transfectants expressing hIL-5Rs. Cells were incubated for 48 h in the presence of increasing concentrations of hIL-5, and incorporated [ $^3$ H]thymidine was measured. The results are expressed as the percentage of incorporation of [ $^3$ H]thymidine in the same cells incubated with 100 Units/ml of hIL-2. Data are shown as mean  $\pm$  SD of three independent transfectant clones. (●) CTLL-h5R $\alpha$  (expressing hIL-5R $\alpha$ ), (□) CTLL- $\beta_c$  (expressing  $\beta_c$ ), and (○) CTLL-h5R $\alpha$ - $\beta_c$  (expressing hIL-5R $\alpha$  and  $\beta_c$ ).

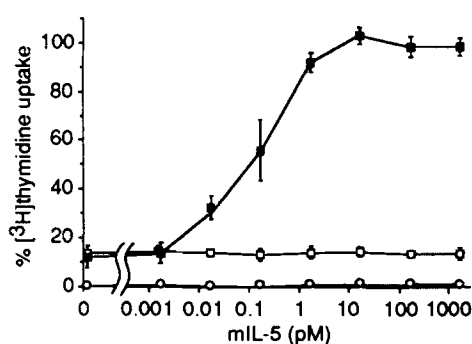

**Figure 6.** IL-5-induced proliferation of FDC-P1 transfectants expressing wild-type (■) or mutant mIL-5R $\alpha$  (□), and CTLL-2 transfectants coexpressing mutant mIL-5R $\alpha$  and AIC2B (○). Cells were incubated for 48 h in the presence of various concentrations of mIL-5 and incorporated [ $^3$ H]thymidine was measured. The results are expressed as the percentage of incorporation of [ $^3$ H]thymidine in the same cells incubated with 100 U/ml of mIL-3 for FDC-P1 transfectants or 100 U/ml of hIL-2 for CTLL-2 transfectant. Data are shown as mean  $\pm$  SD of three independent transfectant clones.

Sharing of the signal-transducing molecule explains many overlapping biological activities of these cytokines, particularly on eosinophils. However, IL-5, IL-3, and GM-CSF induce different responses depending on cell types. We hypothesized that the signals specific for respective cytokines may exist and be mediated by the relevant  $\alpha$  subunit, specific components to respective receptors. To examine the mIL-5R $\alpha$  function, we constructed the mutant cDNA which lacks the whole cytoplasmic domain (Fig. 5 A), and transfected into mouse IL-3-dependent FDC-P1 cells endogenously expressing AIC2B. First, we examined interaction of mutant  $\alpha$  subunit and AIC2B. As shown in Fig. 5 B, the high ( $K_d = 10$  pM) and low-affinity ( $K_d = 2$  nM) mIL-5Rs were reconstituted on FDC-P1 transfectants. The high-affinity receptor was detected

on FDC-P1 transfectants not only at 4°C but also at 37°C (data not shown), indicating that mutant mIL-5R $\alpha$  molecules were retained on cell surface and interacted with AIC2B. Though the number of high-affinity mIL-5R on mutant mIL-5R $\alpha$  transfectants was smaller than that on intact mIL-5R $\alpha$  transfectants, it was indicated that the cytoplasmic portion of mIL-5R $\alpha$  is not indispensable to interact with AIC2B. This interaction was also confirmed by crosslinking experiment (Fig. 5 C). The  $\sim 75$ -kD complex of mutant mIL-5R $\alpha$  and radio-labeled IL-5 and the  $\sim 150$ -kD complex of AIC2B and IL-5 were detected on the FDC-P1 transfectants expressing the mutant  $\alpha$  subunit. We next investigated the IL-5 responsiveness of mutant mIL-5R $\alpha$  transfectants (Fig. 6, □). FDC-P1 transfected with wild-type mIL-5R $\alpha$  prolifer-

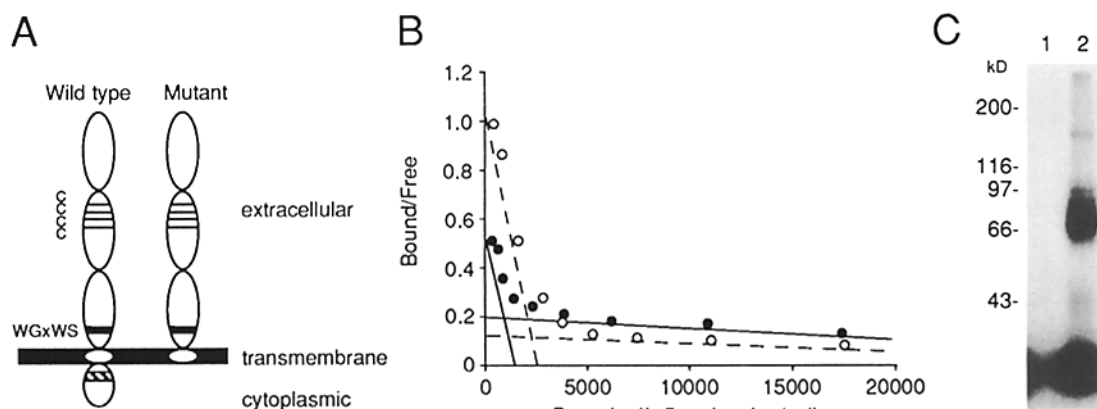

**Figure 5.** (A) Schematic representation of wild-type (left) and mutant mIL-5R $\alpha$  (right). The extracellular portion of the mIL-5R $\alpha$  is divided into three fibronectin-like domains (16). (Hatched box, cytoplasmic domain) Region (RLFPP $^1$ /vPxxx $^K$ /Rxx $^L$ /pD) conserved among each  $\alpha$  subunit of IL-5R, IL-3R, and GM-CSFR. Stop codon was generated just below the transmembrane domain, and the resulting mutant mIL-5R $\alpha$  lacks the whole cytoplasmic domain. (B) Scatchard plot analysis of binding of [ $^{35}$ S]-mIL-5 to FDC-P1 transfectants. (●) FDC-P1 transfectant expressing mutant mIL-5R $\alpha$ ; and (○) FDC-P1 transfectant expressing wild-type mIL-5R $\alpha$ . (C) Crosslinking of radiolabeled mIL-5 to the transfectant expressing mutant mIL-5R $\alpha$ . Chemical crosslinking was performed in the presence (lane 1) or absence (lane 2) of 100-fold molar excess of unlabeled IL-5. The cell lysates were subjected to SDS-PAGE under reducing conditions, and were analyzed by BAS2000 Bioimaging Analyzer (Fuji Photo Film).

ated in response to mIL-5 as previously shown (4). In contrast, FDC-P1 transfectants expressing mutant mIL-5R $\alpha$  did not respond to mIL-5. We obtained essentially the same result with CTLL-2 transfectants. CTLL-2 transfectants coexpressing mutant mIL-5R $\alpha$  and AIC2B did not respond to mIL-5 (Fig. 6, O). The IL-5-mediated growth signal was never transmitted through the high-affinity IL-5R that consisted of mutant  $\alpha$  and wild-type  $\beta$  subunit, indicating that the cytoplasmic domain of IL-5R $\alpha$  has some important roles in transmitting IL-5 signals.

## Discussion

We showed that both the  $\alpha$  and  $\beta$  subunits are indispensable to form the functional IL-5R. hIL-5R $\beta$  was revealed to be the same molecule to the common  $\beta$  subunit ( $\beta_c$ ) of receptors for hGM-CSF and hIL-3. In contrast to mIL-5R, or to receptors for hIL-3 and hGM-CSF,  $\beta_c$  did not contribute much to hIL-5 binding affinity. We observed the same result using L cell or COS7 cell transfectants (data not shown), indicating that the same affinity of the reconstituted hIL-5R is independent of the nature of the parental cell line used for transfection. In other words, the hIL-5 binding is fully reconstituted by coexpressing hIL-5R $\alpha$  and  $\beta_c$ . Tavernier et al. (24) have also reported that  $\beta_c$  is hIL-5R $\beta$ . They isolated cDNAs encoding the soluble form of hIL-5R $\alpha$ , and reported that COS cells expressing chimeric human-mouse IL-5R $\alpha$  bind hIL-5 with low affinity ( $K_d = 1$  nM) by itself, and that cotransfection of  $\beta_c$  with the chimeric IL-5R $\alpha$  leads to a fourfold increase ( $K_d = 250$  pM) in binding affinity (24). The usage of the chimeric IL-5R $\alpha$  may lead to somewhat different results from ours presented in this report. Recently, Tavernier et al. (25) reported that hIL-5 binding affinity of COS cells coexpressing the full-length hIL-5R $\alpha$  and  $\beta_c$  is only twofold higher than that of COS cells expressing hIL-5R $\alpha$  alone. However, it is still not clear how the cross-competition of hIL-5 binding by hIL-3 or hGM-CSF occurs. It is supposed that binding of hIL-5 is irrelevant to the existence of  $\beta_c$ , as the binding affinity of  $\alpha$  alone does not differ so much from that of  $\alpha/\beta$  complex in contrast to hIL-3R and hGM-CSFR systems. The establishment of transfectant coexpressing  $\beta_c$  and  $\alpha$  subunits of hIL-5R, hIL-3R, and hGM-CSFR will answer this confusing question.

In addition to receptors for IL-5, IL-3, and GM-CSF, sharing of signal-transducing component has been demonstrated in receptors for IL-6, leukemia inhibitory factor (LIF), ciliary neurotropic factor (CNTF), and oncostatin M (26). In the IL-6R system, the cytoplasmic and transmembrane domains of the ligand binding subunit (p80 IL-6R) are not required to transduce the growth signal, since the complex of the soluble form of p80 IL-6R and IL-6 associates with the signal-transducing subunit, gp130. There exist some differences between the IL-5R and receptor systems that use gp130 as a signal transducer. First, not only extracellular but also transmembrane regions of IL-5R $\alpha$  are necessary to interact with  $\beta$  subunit. The anchoring of IL-5R $\alpha$  is necessary for interacting with the  $\beta$  subunit, since the soluble form of mIL-5R $\alpha$  inhibits binding of mIL-5 to IL-5-dependent cells (27)

and does not induce proliferation of FDC-P1 even in the presence of IL-5 (Kikuchi, Y., S. Takaki, and K. Takatsu, unpublished data). Second, the cytoplasmic domain of IL-5R $\alpha$  plays an important role in transducing the IL-5 signal. Mutant IL-5R $\alpha$ , which lacks the whole cytoplasmic domain, did not transduce the IL-5-mediated growth signal, though the interaction to AIC2B was not completely impaired (Figs. 5 and 6). It is not clear at this time, how the  $\alpha$  subunit functions in signal transduction. Each  $\alpha$  subunit of IL-5R, IL-3R, and GM-CSFR has conserved region (RLFPP<sup>1</sup>/vPxxx<sup>K</sup>/Rxxx<sup>L</sup>/ixD) just underneath the transmembrane domain (4, 18). This region may be important to interact with the cytoplasmic domain of the common  $\beta$  subunit or with a certain common signal-transducing molecule. The elements of the COOH-terminal region of the respective  $\alpha$  subunit diversified relatively from one another. The specific function of respective cytokine may depend on the structure of the distal part of the cytoplasmic portion of the  $\alpha$  subunits. Or, each  $\alpha$  subunit may simply support the function of the common  $\beta$  subunit by inducing conformational change or dimerization of the  $\beta$  subunit. CTLL-2 cells transfected with the chimeric receptor that consists of the extracellular domain of erythropoietin receptor (EPO-R) and the cytoplasmic domain of AIC2A, become responsive to EPO (28). Recent studies showed that EPO-R may be activated by homodimerization (29). If that is the case, homodimerization of the cytoplasmic domain of AIC2A may be sufficient to transmit the IL-3-mediated signal. From a high degree of homology between AIC2A and AIC2B (6), it is supposed that similar dimerization mechanism may be involved in IL-5-mediated signal transduction. However, this may only be the case in the signal transduction for cell growth. In other cases, such as signals for B cells to induce differentiation for Ig-secreting cells, the cytoplasmic domain of the  $\alpha$  subunit may have some important roles in transmitting IL-5-specific signal. It is possible that there are several signal-transducing machineries that connect with the membrane receptors to the intracellular device, and that some machineries function only in a limited cell type.

A recent study (30) showed that the cytoplasmic region of  $\beta_c$  has critical function in transducing growth signal. In addition, it was shown that the cytoplasmic region of hGM-CSFR $\alpha$  also has some roles in transmitting hGM-CSF-mediated signal (30). The transfectant of mIL-3-dependent Ba/F3 or mIL-2-dependent CTLL-2 expressing mutant hGM-CSFR $\alpha$  and  $\beta_c$  does not respond to hGM-CSF at the beginning of culture, but adapts to response to hGM-CSF several days later (30). In the case of mIL-5R $\alpha$ , the cytoplasmic domain was indispensable for transmitting signal, because the FDC-P1 transfectant expressing mutant IL-5R $\alpha$  and the CTLL-2 transfectant coexpressing mutant IL-5R $\alpha$  and AIC2B never became responsive to mIL-5. Even when the transfectants were cultured for several weeks in the presence of mIL-5, no IL-5-responsive transfectant grew up (data not shown). This discrepancy between hGM-CSFR and mIL-5R may suggest the functional difference of each  $\alpha$  subunit. In addition, CTLL-2 transfectants expressing hIL-3R $\alpha$  became responsive to hIL-3 because of the induction of the intrinsic AIC2B expression, whereas the transfectant expressing hGM-CSFR $\alpha$

expression, whereas the transfectant expressing hGM-CSFR $\alpha$  did not induce any AIC2B expression (31). There is an interesting report (32) showing that IL-3 and GM-CSF induce self-renewal and differentiation activity, respectively, in different proportions in FDC-mix cells. These results may

reflect the difference of signal-transmitting ability of each  $\alpha$  subunit. Further studies using mutant receptors and reconstitution experiments in a variety of cell types will be required to dissolve the function of the common  $\beta$  subunit and ligand-specific  $\alpha$  subunits in signal transduction.

We wish to thank Dr. Shin Yonehara for providing anti-Aic-2 mAb, and Drs. Seiji Mita and Masahiro Migita for helpful discussions and encouragement.

This study was supported, in part, by a Grant-in-Aid for Scientific Research and for Special Project Research, Cancer Bioscience, from the Ministry of Education, Science and Culture of Japan; and by Special Coordination Funds for Promoting Science and Technology of the Science and Technology Agency, Japan; and by a Grant-in-Aid from the Japan Society for the Promotion of Science for Japanese Junior Scientists. DNAX Research Institute of Molecular and Cellular Biology is supported by the Schering-Plough Corporation.

Address correspondence to Dr. Satoshi Takaki, Department of Immunology, Institute of Medical Science, The University of Tokyo, 4-6-1 Shirokanedai, Minato-ku, Tokyo 108, Japan.

Received for publication 13 November 1992 and in revised form 29 January 1993.

## References

1. Takatsu, K. 1992. Interleukin-5. *Curr. Opin. Immunol.* 4:299.
2. Sanderson, C.J. 1992. Interleukin-5, eosinophils, and disease. *Blood.* 79:3101.
3. Mita, S., A. Tominaga, Y. Hitoshi, K. Sakamoto, T. Honjo, M. Akagi, Y. Kikuchi, N. Yamaguchi, and K. Takatsu. 1989. Characterization of high-affinity receptors for interleukin 5 on interleukin 5-dependent cell lines. *Proc. Natl. Acad. Sci. USA.* 86:2311.
4. Takaki, S., A. Tominaga, Y. Hitoshi, S. Mita, E. Sonoda, N. Yamaguchi, and K. Takatsu. 1990. Molecular cloning and expression of the murine interleukin-5 receptor. *EMBO (Eur. Mol. Biol. Organ.) J.* 9:4367.
5. Mita, S., S. Takaki, Y. Hitoshi, A.G. Rolink, A. Tominaga, N. Yamaguchi, and K. Takatsu. 1991. Molecular characterization of the  $\beta$  chain of the murine interleukin 5 receptor. *Int. Immunol.* 3:665.
6. Gorman, D.M., N. Itoh, T. Kitamura, J. Schreurs, S. Yonehara, I. Yahara, K. Arai, and A. Miyajima. 1990. Cloning and expression of a gene encoding an interleukin 3 receptor-like protein: identification of another member of the cytokine receptor gene family. *Proc. Natl. Acad. Sci. USA.* 87:5459.
7. Itoh, N., S. Yonehara, J. Schreurs, D.M. Gorman, K. Maruyama, A. Ishii, I. Yahara, K. Arai, and A. Miyajima. 1990. Cloning of an interleukin-3 receptor gene: a member of a distinct receptor gene family. *Science (Wash. DC).* 247:324.
8. Takaki, S., S. Mita, T. Kitamura, S. Yonehara, N. Yamaguchi, A. Tominaga, A. Miyajima, and K. Takatsu. 1991. Identification of the second subunit of the murine interleukin-5 receptor: interleukin-3 receptor-like protein, AIC2B is a component of the high affinity interleukin-5 receptor. *EMBO (Eur. Mol. Biol. Organ.) J.* 10:2833.
9. Devos, R., G. Plaetinck, J. Van der Heyden, S. Cornelis, J. Vandekerckhove, W. Fiers, and J. Tavernier. 1991. Molecular basis of a high affinity murine interleukin-5 receptor. *EMBO (Eur. Mol. Biol. Organ.) J.* 10:2133.
10. Plaetinck, G., J. Van der Heyden, J. Tavernier, I. Faché, T. Tuypens, S. Fischkoff, W. Fiers, and R. Devos. 1990. Characterization of interleukin 5 receptors on eosinophilic sublines from human promyelocytic leukemia (HL-60) cells. *J. Exp. Med.* 172:683.
11. Chihara, J., J. Plumas, V. Gruart, J. Tavernier, L. Prin, A. Capron, and M. Capron. 1990. Characterization of a receptor for interleukin 5 on human eosinophils: variable expression and induction by granulocyte/macrophage colony-stimulating factor. *J. Exp. Med.* 172:1347.
12. Migita, M., N. Yamaguchi, S. Mita, S. Higuchi, Y. Hitoshi, Y. Yoshida, M. Tomonaga, I. Matsuda, A. Tominaga, and K. Takatsu. 1991. Characterization of the human IL-5 receptors on eosinophils. *Cell. Immunol.* 133:484.
13. Ingley, E., and I.G. Young. 1991. Characterization of a receptor for interleukin-5 on human eosinophils and the myeloid leukemia line HL-60. *Blood.* 78:339.
14. Kitamura, T., F. Takaku, and A. Miyajima. 1991. IL-1 up-regulates the expression of cytokine receptors on a factor-dependent human hemopoietic cell line, TF-1. *Int. Immunol.* 3:571.
15. Lopez, A.F., M.A. Vadas, J.M. Woodstock, S.E. Milton, A. Lewis, M.J. Elliott, D. Gillis, R. Ireland, E. Olwell, and L.S. Park. 1991. Interleukin-5, interleukin-3, and granulocyte-macrophage colony-stimulating factor cross-compete for binding to cell surface receptors on human eosinophils. *J. Biol. Chem.* 266:24741.
16. Murata, Y., S. Takaki, M. Migita, Y. Kikuchi, A. Tominaga, and K. Takatsu. 1992. Molecular cloning and expression of the human interleukin 5 receptor. *J. Exp. Med.* 175:341.
17. Hayashida, K., T. Kitamura, D.M. Gorman, K. Arai, T. Yokota, and A. Miyajima. 1990. Molecular cloning of a second subunit of the receptor for human granulocyte-macrophage colony-stimulating factor (GM-CSF): reconstitution of a high-affinity GM-CSF receptor. *Proc. Natl. Acad. Sci. USA.* 87:9655.
18. Kitamura, T., N. Sato, K. Arai, and A. Miyajima. 1991. Ex-

- pression cloning of the human IL-3 receptor cDNA reveals a shared  $\beta$  subunit for the human IL-3 and GM-CSF receptors. *Cell*. 66:1165.
19. Hara, T., and A. Miyajima. 1992. Two distinct functional high affinity receptors for mouse interleukin-3 (IL-3). *EMBO (Eur. Mol. Biol. Organ.) J.* 11:1875.
  20. Park, L.S., U. Martin, R. Sorensen, S. Luhr, P.J. Morrissey, D. Cosman, and A. Larsen. 1992. Cloning of the low-affinity murine granulocyte-macrophage colony-stimulating factor receptor and reconstitution of a high-affinity receptor complex. *Proc. Natl. Acad. Sci. USA*. 89:4295.
  21. Yamaguchi, N., Y. Hitoshi, S. Mita, Y. Hosoya, Y. Murata, Y. Kikuchi, A. Tominaga, and K. Takatsu. 1990. Characterization of the murine interleukin 5 receptor by using a monoclonal antibody. *Int. Immunol.* 2:181.
  22. Yonehara, S., A. Ishii, M. Yonehara, S. Koyasu, A. Miyajima, J. Schreurs, K. Arai, and I. Yahara. 1990. Identification of a cell surface 105 kd protein (Aic-2 antigen) which binds interleukin-3. *Int. Immunol.* 2:143.
  23. Watanabe, Y., T. Kitamura, K. Hayashida, and A. Miyajima. Monoclonal antibody against the common  $\beta$  subunit ( $\beta_c$ ) of the human IL-3, IL-5 and GM-CSF receptors shows upregulation of  $\beta_c$  by IL-1 and TNF- $\alpha$ . *Blood*. 80:2215.
  24. Tavernier, J., R. Devos, S. Cornelis, T. Tuypens, J. Van der Heyden, W. Fiers, and G. Plaetinck. 1991. A human high affinity interleukin-5 receptor (IL5R) is composed of an IL5-specific  $\alpha$  chain and a  $\beta$  chain shared with the receptor for GM-CSF. *Cell*. 66:1175.
  25. Tavernier, J., T. Tuypens, G. Plaetinck, A. Verhee, W. Fiers, and R. Devos. 1992. Molecular basis of the membrane-anchored and two soluble isoforms of the human interleukin 5 receptor  $\alpha$  subunit. *Proc. Natl. Acad. Sci. USA*. 89:7041.
  26. Kishimoto, T., S. Akira, and T. Taga. 1992. Interleukin-6 and its receptor: a paradigm for cytokines. *Science (Wash. DC)*. 258:593.
  27. Yamaguchi, N., Y. Hitoshi, S. Takaki, Y. Murata, M. Migita, T. Kamiya, J. Minowada, A. Tominaga, and K. Takatsu. 1991. Murine interleukin 5 receptor isolated by immunoaffinity chromatography: comparison of determined N-terminal sequence and deduced primary sequence from cDNA and implication of a role of the intracytoplasmic domain. *Int. Immunol.* 3:889.
  28. Zon, L.I., J.-F. Moreau, J.-W. Koo, B. Mathey-Prevot, and A.D. D'Andrea. 1992. The erythropoietin receptor transmembrane region is necessary for activation by the friend spleen focus-forming virus gp55 glycoprotein. *Mol. Cell. Biol.* 12:2949.
  29. Watowich, S.S., A. Yoshimura, G.D. Longmore, D.J. Hilton, Y. Yoshimura, and H.F. Lodish. 1992. Homodimerization and constitutive activation of the erythropoietin receptor. *Proc. Natl. Acad. Sci. USA*. 89:2140.
  30. Sakamaki, K., I. Miyajima, T. Kitamura, and A. Miyajima. 1992. Critical cytoplasmic domains of the common  $\beta$  subunit of the human GM-CSF, IL-3 and IL-5 receptors for growth signal transduction and tyrosine phosphorylation. *EMBO (Eur. Mol. Biol. Organ.) J.* 11:3541.
  31. Kitamura, T., and A. Miyajima. 1992. Functional reconstitution of the human interleukin-3 receptor. *Blood*. 80:84.
  32. Just, U., C. Stocking, E. Spooncer, T.M. Dexter, and W. Os-terttag. 1991. Expression of the GM-CSF gene after retroviral transfer in hematopoietic stem cell lines induces synchronous granulocyte-macrophage differentiation. *Cell*. 64:1163.
